# Supplementary material for: Development of novel InDel markers and genetic diversity in Chenopodium quinoa through whole-genome re-sequencing
Source: PubMed Central journal article supplement (PMC5584319; doi:10.1186/s12864-017-4093-8), 2017-09-05

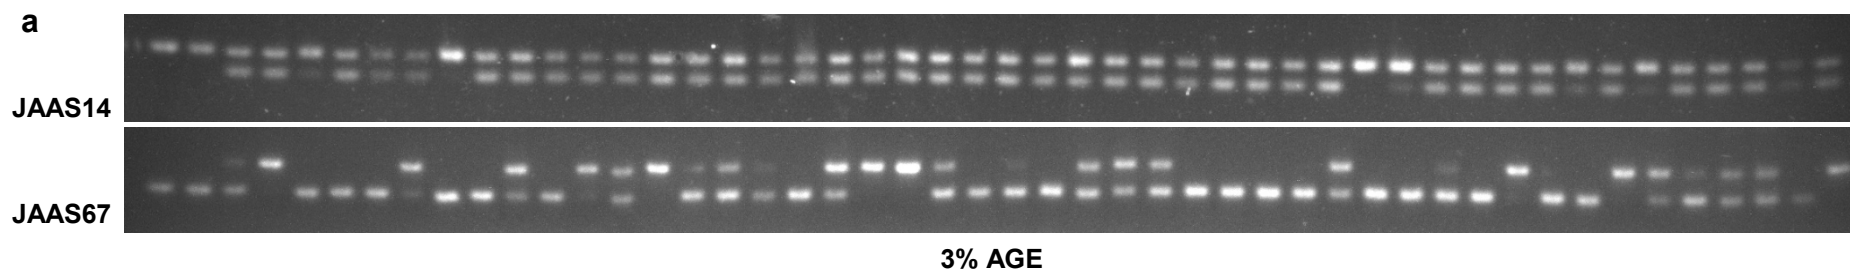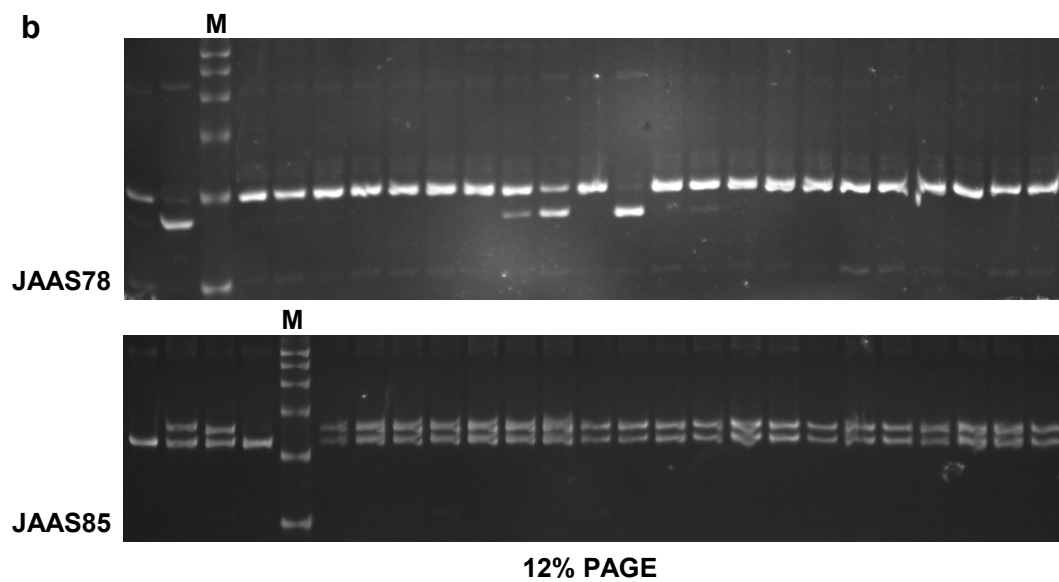

Supplement: 12864_2017_4093_MOESM5_ESM.pdf [file 12864_2017_4093_MOESM5_ESM.pdf]
